# Supplementary material for: Novel Babesia bovis exported proteins that modify properties of infected red blood cells
Source: PLoS Pathog. 2020 Oct 5;16(10):e1008917. doi: 10.1371/journal.ppat.1008917 (PMC7561165; doi:10.1371/journal.ppat.1008917)
Supplement: S4 Table — (XLSX) [file ppat.1008917.s012.xlsx]

## Sheet: Sheet1
List of mtm in B. bovis genome
A-type	B-type	Other
BBOV_I001200	BBOV_I001380	BBOV_I001100
BBOV_I001310	BBOV_II000070	BBOV_I001110
BBOV_II000020	BBOV_II007760	BBOV_I001350
BBOV_II004200	BBOV_II007770	BBOV_II000120
BBOV_II007800	BBOV_III000060	BBOV_II007620
BBOV_II007840	BBOV_III011920	BBOV_III000030
BBOV_III000010	BBOV_IV000100	BBOV_III000680
BBOV_III001210	BBOV_IV000110	BBOV_III001190
BBOV_III001290	BBOV_IV012090	BBOV_III001230
BBOV_III002360	BBOV_IV012100	BBOV_III001310
BBOV_III011980		BBOV_III001330
BBOV_IV000020		BBOV_III008030
BBOV_IV000210		BBOV_III009940
BBOV_IV000340		BBOV_IV000050
BBOV_IV005630		BBOV_IV000080
BBOV_IV012120		BBOV_IV000360
		BBOV_IV000370
		BBOV_IV012160
